# Supplementary material for: Schiff Base Compounds as Fluorescent Probes for the Highly Sensitive and Selective Detection of Al3+ Ions
Source: MDPI journal article supplement (doi:10.3390/molecules28073090), 2023-03-30
Supplement: s1 [file s1]

## Supplementary Materials

# Schiff Base Compounds as Fluorescent Probes for the Highly Sensitive and Selective Detection of Al<sup>3+</sup> Ions

Yanling Pang <sup>1</sup>, Desu Meng <sup>1</sup>, Jian Liu <sup>2,\*</sup>, Shengxia Duan <sup>1,\*</sup>, Jingru Fan <sup>1</sup>, Longyu Gao <sup>1</sup>  
and Xinshu Long <sup>1</sup>

<sup>1</sup> Department of Chemistry and Engineering, Heze University, Heze 274500, China

<sup>2</sup> College of Agriculture and Bioengineering, Heze University, Heze 274000, China

\* Correspondence: liujian61@hezeu.edu.cn (J.L.); duanshengxia@hezeu.edu.cn (S.D.)

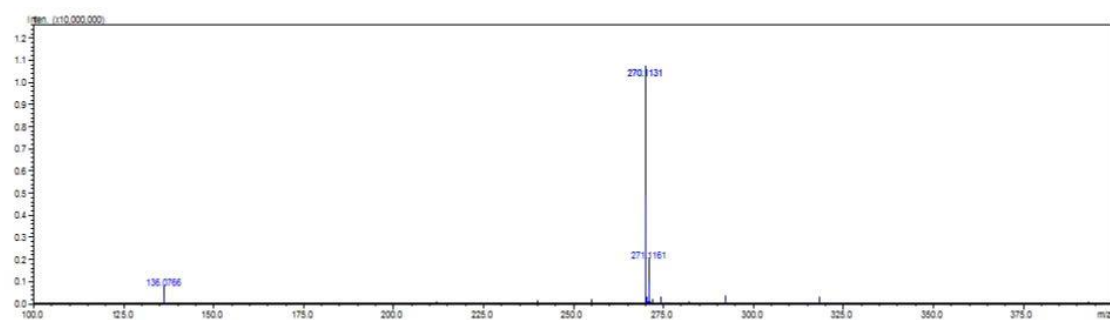

**Figure S1** HRMS spectrum of L.

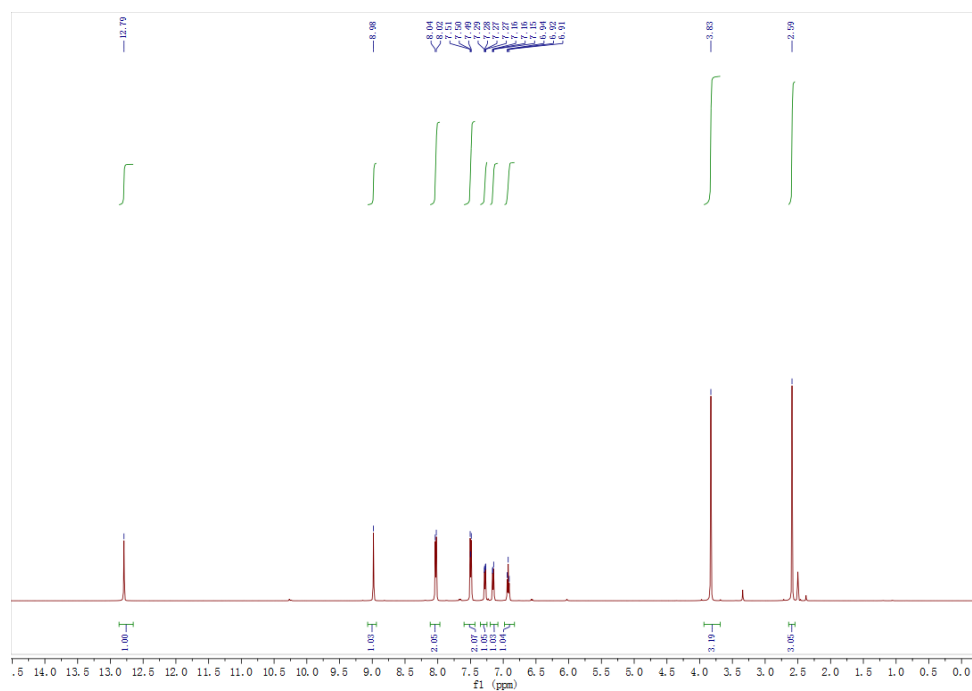

**Figure S2**  $^1\text{H}$  NMR spectrum of L.

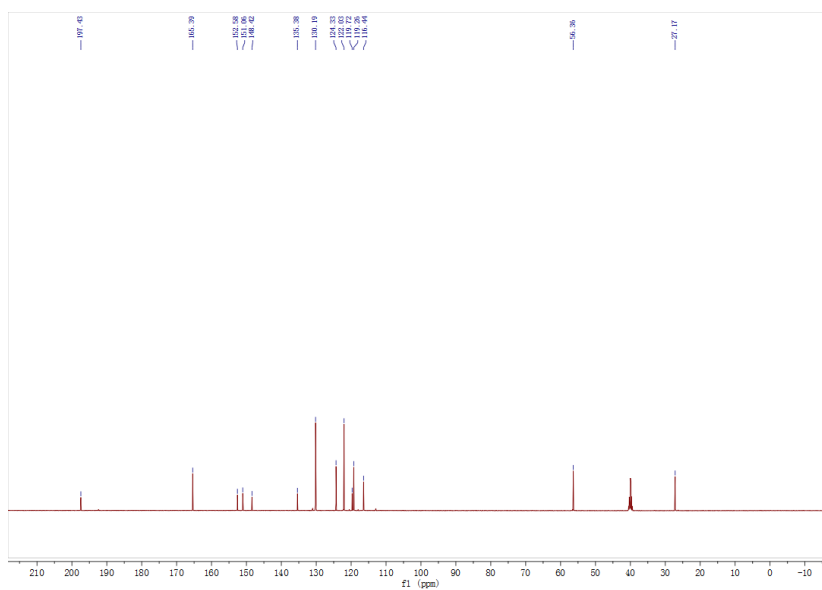

**Figure S3**  $^{13}\text{C}$  NMR spectrum of L.

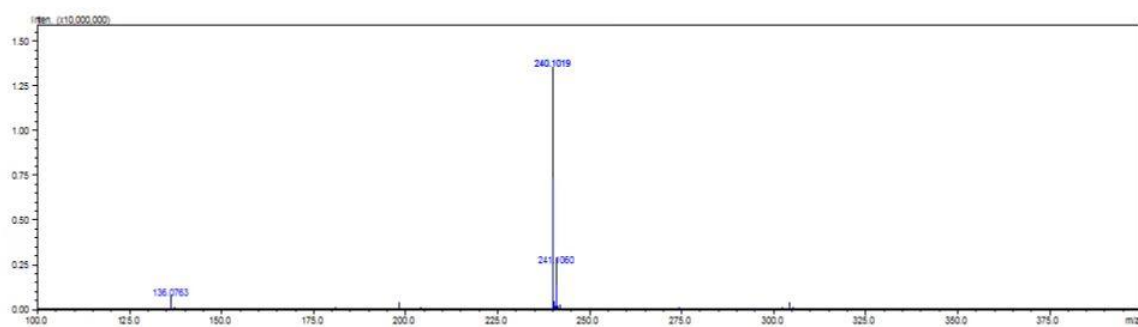

**Figure S4** HRMS spectrum of S.

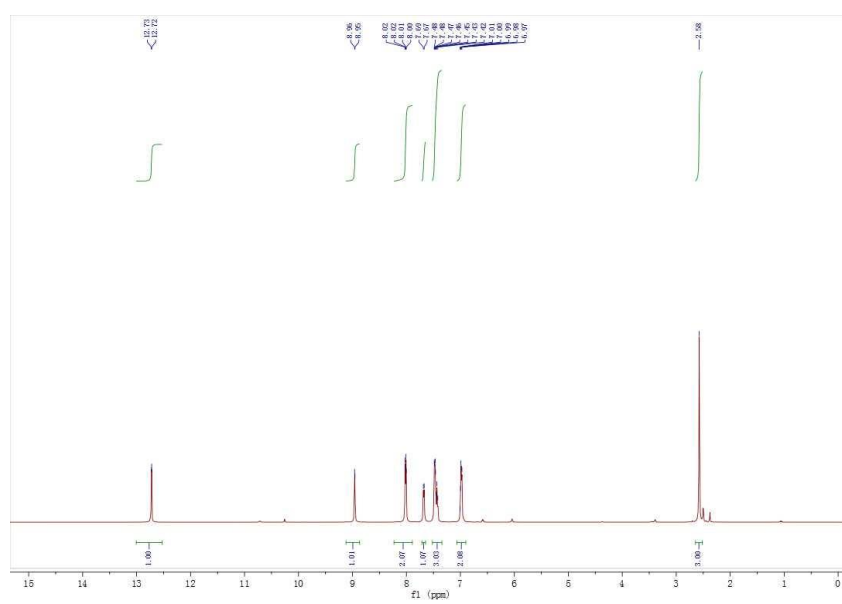

**Figure S5**  $^1\text{H}$  NMR spectrum of S.

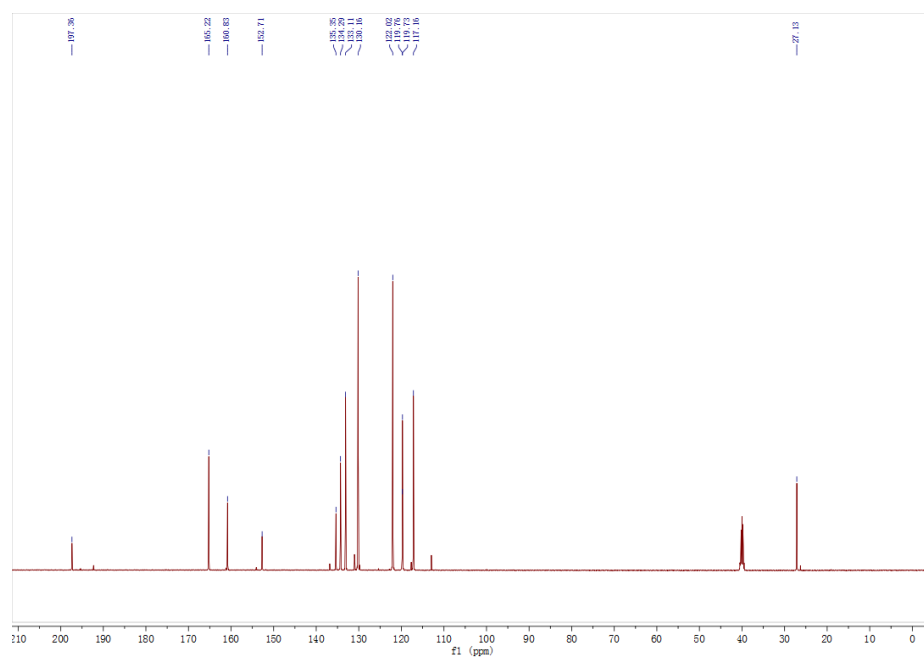

**Figure S6** <sup>13</sup>C NMR spectrum of S.
